# Supplementary material for: Influence of MnO2-Birnessite Microstructure on the Electrochemical Performance of Aqueous Zinc Ion Batteries
Source: MDPI journal article supplement (doi:10.3390/app12031176), 2022-01-23
Supplement: s1 [file s1]

## Supporting Information

### Influence of MnO<sub>2</sub>-birnessite microstructure on the electrochemical performance of Aqueous Zinc Ion Batteries.

M.L. López<sup>1,\*</sup>, I. Álvarez-Serrano<sup>1</sup>, D. A. Giraldo<sup>1,2</sup>, P. Almodóvar<sup>2</sup>, E. Rodríguez-Aguado<sup>3</sup>, E. Rodríguez-Castellón<sup>3</sup>.

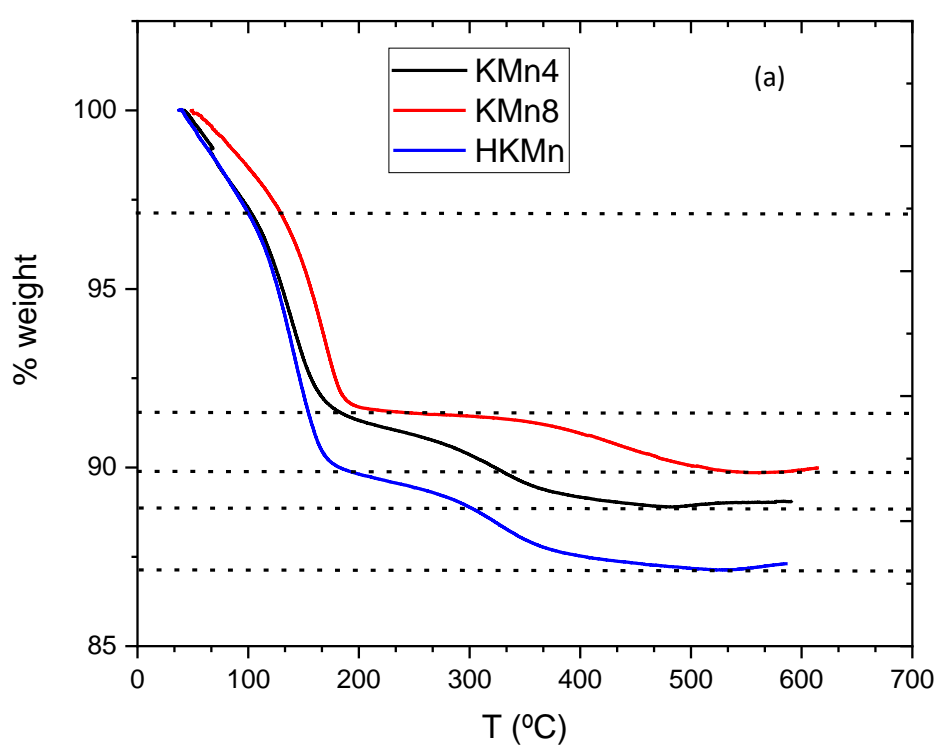

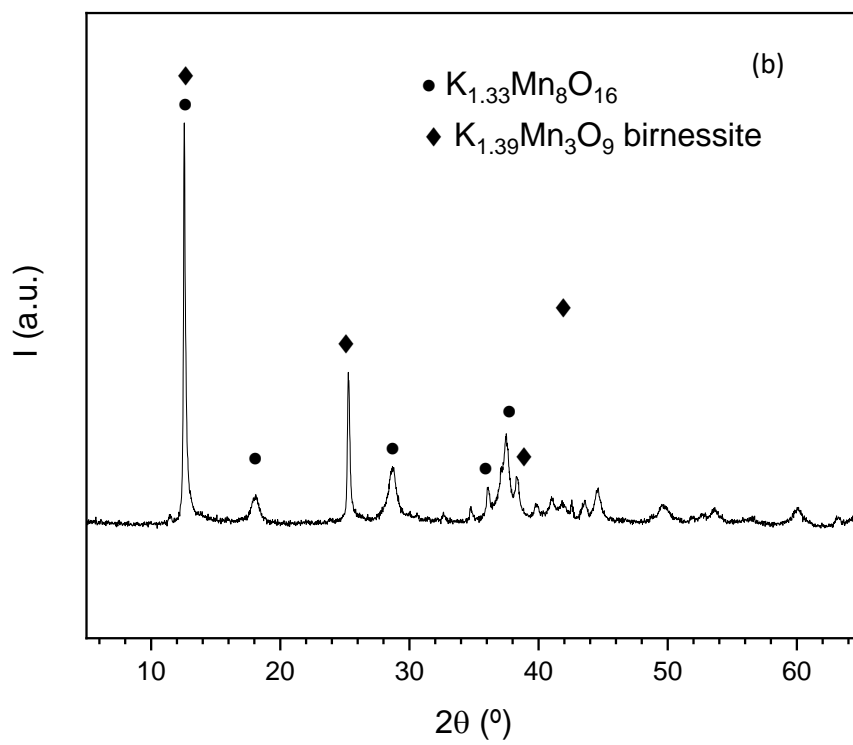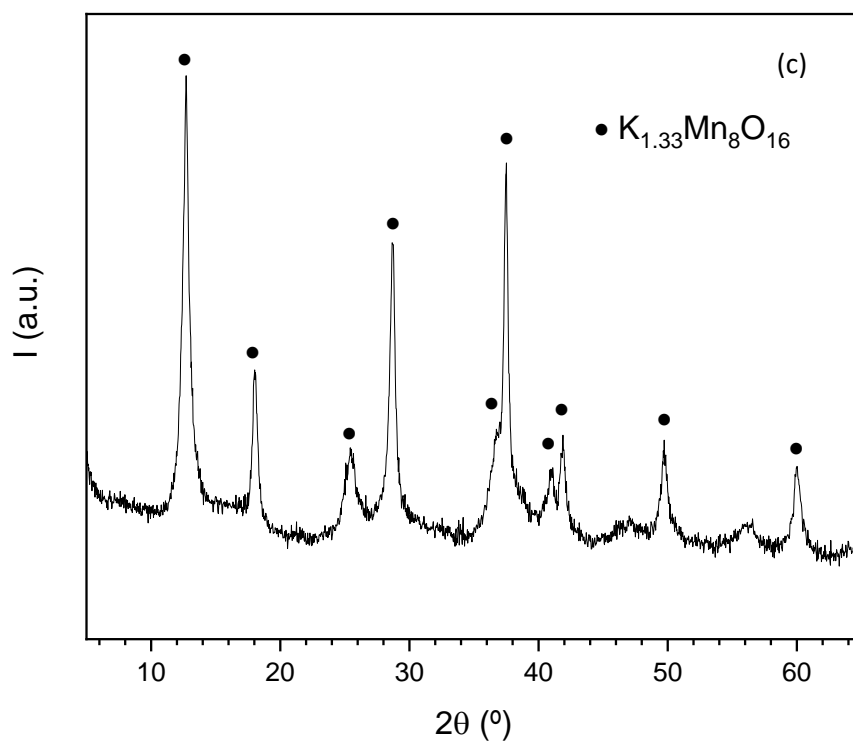

**Figure S1.-** a) Thermogravimetric analysis under N<sub>2</sub> for all samples. b) XRD profile of KMn8 residue, the maxima were assigned to a mixture of phases: birnessite and K<sub>1.33</sub>Mn<sub>8</sub>O<sub>16</sub> ; c) XRD profile of the HKMn residue, the maxima were indexed to K<sub>1.33</sub>Mn<sub>8</sub>O<sub>16</sub>

**Table S1.** Weight loss from ATG data (%) and Structural formulas for birnessite-type material obtained from EDX and ATG data

| Sample | RT-110°C | 110-200°C | 250-500°C | Formulae                                               |
|--------|----------|-----------|-----------|--------------------------------------------------------|
| KMn4   | 3.1      | 5.4       | 2.6       | K <sub>0.3</sub> MnO <sub>2</sub> ·0.3H <sub>2</sub> O |
| KMn8   | 2.1      | 6.2       | 1.5       | K <sub>0.3</sub> MnO <sub>2</sub> ·0.4H <sub>2</sub> O |
| HKMn   | 3.1      | 6.8       | 2.9       | K <sub>0.1</sub> MnO <sub>2</sub> ·0.4H <sub>2</sub> O |
